# Supplementary material for: Metformin Treatment and Cancer Risk: Cox Regression Analysis, With Time-Dependent Covariates, of 320,000 Persons With Incident Diabetes Mellitus
Source: PubMed Central journal article supplement — Am J Epidemiol. 2019 Jul 3;188(10):1794–800. doi: 10.1093/aje/kwz157 (PMC6768811; doi:10.1093/aje/kwz157), 2019-07-03
Supplement: kwz157_dankner_web_material_final.pdf [file kwz157_dankner_web_material_final.pdf]

**Metformin Treatment and Cancer Risk: Cox Regression Analysis With  
Time-Dependent Covariates of 320,000 Persons With Incident Diabetes  
Mellitus**

Rachel Dankner, Nirit Agay, Liraz Olmer, Havi Murad, Lital Keinan Boker, Ran  
D. Balicer, and Laurence S. Freedman

Table of contents:

Web Appendix

Web Tables 1–5

## Web Appendix

### *Development of the Cox Model for Incorporating Weighted Cumulative Exposure*

As explained in the Methods section of the main text, we made a simplifying assumption that the weighted cumulative exposure was represented by:

$$WCE(t) = w_1 \sum_{u=1}^4 D(t-u) + w_2 \sum_{u=5}^{16} D(t-u) + w_3 \sum_{u=17}^{28} D(t-u) + w_4 \sum_{u=29}^{40} D(t-u),$$

where  $t$  represents the current quarter,  $D(t)$  is the average dose taken in quarter  $t$ , and the  $w$ 's are unknown weights.

Furthermore, we assumed the following Cox model:

$$\lambda(t) = \lambda_0(t) \exp \{ \beta_w WCE(t) + \beta_c C \} \quad (A1)$$

where  $\lambda(t)$  is the individual's hazard rate at time  $t$  for the cancer of interest,  $\lambda_0(t)$  is the baseline hazard rate,  $\beta_w$  is the coefficient of  $WCE(t)$ ,  $C$  are the baseline confounders, and  $\beta_c$  are their coefficients. Substituting the above expression for  $WCE(t)$  into the model (A1), we obtain:

$$\lambda(t) = \lambda_0(t) \exp \left\{ \beta_w \left[ w_1 \sum_{u=1}^4 D(t-u) + w_2 \sum_{u=5}^{16} D(t-u) + w_3 \sum_{u=17}^{28} D(t-u) + w_4 \sum_{u=29}^{40} D(t-u) \right] + \beta_c C \right\}$$

We now write  $D_1(t) = \sum_{u=1}^4 D(t-u) / 4$ , the mean dose taken in the year

previous to quarter  $t$ . Similarly, we write  $D_2(t) = \sum_{u=5}^{16} D(t-u) / 12$ ,

$$D_3(t) = \sum_{u=17}^{28} D(t-u)/12 \text{ and } D_4(t) = \sum_{u=29}^{40} D(t-u)/12, \text{ the mean doses over the}$$

years 1-4, 5-7 and 8-10 previous to t. This yields the model:

$$\lambda(t) = \lambda_0(t) \exp\{\beta_w [4w_1D_1(t) + 12w_2D_2(t) + 12w_3D_3(t) + 12w_4D_4(t)] + \beta_C C\}.$$

Finally, we set  $\beta_1 = 4\beta_w w_1, \beta_2 = 12\beta_w w_2, \beta_3 = 12\beta_w w_3,$  and  $\beta_4 = 12\beta_w w_4$  to

give us the Cox model

$$\lambda(t) = \lambda_0(t) \exp\{\beta_1 D_1(t) + \beta_2 D_2(t) + \beta_3 D_3(t) + \beta_4 D_4(t) + \beta_C C\},$$

as written in the main text. The variables  $D_1(t), D_2(t), D_3(t)$  and  $D_4(t)$  can be readily calculated from the mean doses in each quarter, according to the formulas given above.

**Web Table 1.** Regression Coefficient Estimates for the Cox Model for Assessing Association Between Metformin Exposure and All-Sites Cancer (Excluding Prostate and Pancreatic Cancer) During 2004–2012 in Israeli Individuals with Diabetes, Controlling for All Other Glucose-Lowering Medications, and Adjusting for Confounding Variables

| Variable (Reference Group)                                            | Category (for Categorical Variables) or Time Period (for Drug Variables) | Estimated Coefficient | Standard Error | P Value (2-Sided) |
|-----------------------------------------------------------------------|--------------------------------------------------------------------------|-----------------------|----------------|-------------------|
| Age (vs. <55 years)                                                   | 55–59 years                                                              | 2.25                  | 0.50           | <0.001            |
|                                                                       | 60–64 years                                                              | 2.50                  | 0.50           | <0.001            |
|                                                                       | 65–69 years                                                              | 2.71                  | 0.50           | <0.001            |
|                                                                       | 70–74 years                                                              | 2.84                  | 0.50           | <0.001            |
|                                                                       | 75–79 years                                                              | 2.90                  | 0.50           | <0.001            |
|                                                                       | 80–84 years                                                              | 3.00                  | 0.50           | <0.001            |
|                                                                       | ≥85 years                                                                | 2.95                  | 0.50           | <0.001            |
| Sex (vs. male)                                                        | Female                                                                   | -0.004                | 0.05           | 0.82              |
| SES (vs. low)                                                         | High                                                                     | -0.039                | 0.028          | 0.16              |
|                                                                       | Medium                                                                   | -0.047                | 0.021          | 0.03              |
|                                                                       | Missing                                                                  | -0.026                | 0.057          | 0.65              |
| Ethnicity/country of origin (vs. European-American Jew)               | Israel Arab                                                              | -0.42                 | 0.03           | <0.001            |
|                                                                       | Ethiopian Jew                                                            | -0.86                 | 0.12           | <0.001            |
|                                                                       | Israel Jew                                                               | -0.16                 | 0.03           | <0.001            |
|                                                                       | Asian-African Jew                                                        | -0.24                 | 0.02           | <0.001            |
|                                                                       | Yemeni Jew                                                               | -0.35                 | 0.05           | <0.001            |
| Insulin                                                               | Previous year                                                            | 0.11                  | 0.08           | 0.19              |
|                                                                       | Previous 1–4 years                                                       | 0.00                  | 0.16           | 0.99              |
|                                                                       | Previous 5–7 years                                                       | -0.15                 | 0.28           | 0.59              |
|                                                                       | Previous 8–10 years                                                      | 0.38                  | 0.61           | 0.54              |
| Metformin (with or without DPP4i)                                     | Previous year                                                            | 0.01                  | 0.05           | 0.87              |
|                                                                       | Previous 1–4 years                                                       | -0.05                 | 0.08           | 0.57              |
|                                                                       | Previous 5–7 years                                                       | 0.03                  | 0.11           | 0.79              |
|                                                                       | Previous 8–10 years                                                      | 0.39                  | 0.23           | 0.09              |
| Insulin secretagogues <sup>a</sup> and incretin mimetics <sup>b</sup> | Previous year                                                            | 0.05                  | 0.05           | 0.34              |
|                                                                       | Previous 1–4 years                                                       | -0.02                 | 0.09           | 0.83              |
|                                                                       | Previous 5–7 years                                                       | 0.11                  | 0.14           | 0.43              |
|                                                                       | Previous 8–10 years                                                      | -0.29                 | 0.36           | 0.43              |
| Alpha-glucosidase inhibitor                                           | Previous year                                                            | 0.40                  | 0.39           | 0.30              |
|                                                                       | Previous 1–4 years                                                       | -1.14                 | 0.68           | 0.09              |
|                                                                       | Previous 5–7 years                                                       | 1.45                  | 0.83           | 0.08              |
|                                                                       | Previous 8–10 years                                                      | -5.72                 | 3.56           | 0.10              |
| Rosiglitazone                                                         | Previous year                                                            | -0.36                 | 0.30           | 0.22              |
|                                                                       | Previous 1–4 years                                                       | 0.34                  | 0.39           | 0.38              |
|                                                                       | Previous 5–7 years                                                       | -0.35                 | 0.70           | 0.62              |
|                                                                       | Previous 8–10 years                                                      | -4.41                 | 5.57           | 0.43              |

DPP4i, dipeptidyl peptidase-4 inhibitors.

<sup>a</sup> Sulfonylureas and meglitinides.

<sup>b</sup> Dipeptidyl peptidase-4 inhibitors (DPP4i) and glucagon-like peptide-1 receptor agonists.

**Web Table 2.** Regression Coefficient Estimates for the Cox Model for Assessing Association Between Metformin Exposure and Colon Cancer (Excluding Prostate and Pancreatic Cancer) During 2004–2012 in Israeli Individuals with Diabetes, Controlling for All Other Glucose-Lowering Medications, and Adjusting for Confounding Variables

| Variable (Reference Group)                                            | Category (for Categorical Variables) or Time-Period (for Drug Variables) | Estimated Coefficient | Standard Error | P Value (2-Sided) |
|-----------------------------------------------------------------------|--------------------------------------------------------------------------|-----------------------|----------------|-------------------|
| Age (vs. <50 years)                                                   | 50–59 years                                                              | 0.99                  | 0.11           | <0.001            |
|                                                                       | 60–69 years                                                              | 1.75                  | 0.10           | <0.001            |
|                                                                       | 70–79 years                                                              | 2.16                  | 0.10           | <0.001            |
|                                                                       | ≥80 years                                                                | 2.31                  | 0.11           | <0.001            |
| Sex (vs. male)                                                        | Female                                                                   | -0.39                 | 0.04           | <0.001            |
| SES (vs. low)                                                         | High                                                                     | -0.11                 | 0.07           | 0.09              |
|                                                                       | Medium                                                                   | -0.05                 | 0.05           | 0.34              |
|                                                                       | Missing                                                                  | -0.04                 | 0.14           | 0.78              |
| Ethnicity/country of origin (vs. European-American Jew)               | Israel Arab                                                              | -0.40                 | 0.08           | <0.001            |
|                                                                       | Ethiopian Jew                                                            | -1.30                 | 0.34           | 0.001             |
|                                                                       | Israel Jew                                                               | -0.54                 | 0.07           | <0.001            |
|                                                                       | Asian–African Jew                                                        | -0.30                 | 0.05           | <0.001            |
|                                                                       | Yemeni Jew                                                               | -0.24                 | 0.11           | 0.02              |
| Insulin                                                               | Previous year                                                            | -0.14                 | 0.24           | 0.56              |
|                                                                       | Previous 1–4 years                                                       | 0.24                  | 0.43           | 0.58              |
|                                                                       | Previous 5–7 years                                                       | -0.35                 | 0.92           | 0.70              |
|                                                                       | Previous 8–10 years                                                      | 13.0                  | 13.2           | 0.33              |
| Metformin (with or without DPP4i)                                     | Previous year                                                            | 0.08                  | 0.12           | 0.52              |
|                                                                       | Previous 1–4 years                                                       | 0.13                  | 0.19           | 0.50              |
|                                                                       | Previous 5–7 years                                                       | -0.08                 | 0.26           | 0.76              |
|                                                                       | Previous 8–10 years                                                      | -0.70                 | 0.68           | 0.30              |
| Insulin secretagogues <sup>a</sup> and incretin mimetics <sup>b</sup> | Previous year                                                            | -0.15                 | 0.13           | 0.27              |
|                                                                       | Previous 1–4 years                                                       | 0.54                  | 0.22           | 0.014             |
|                                                                       | Previous 5–7 years                                                       | -0.58                 | 0.37           | 0.12              |
|                                                                       | Previous 8–10 years                                                      | 1.11                  | 0.81           | 0.17              |
| Alpha-glucosidase inhibitor                                           | Previous year                                                            | 0.02                  | 1.17           | 0.99              |
|                                                                       | Previous 1–4 years                                                       | -2.77                 | 2.48           | 0.27              |
|                                                                       | Previous 5–7 years                                                       | -3.06                 | 4.62           | 0.51              |
|                                                                       | Previous 8–10 years                                                      | -1.02                 | 9.61           | 0.92              |
| Rosiglitazone                                                         | Previous year                                                            | -0.26                 | 0.73           | 0.72              |
|                                                                       | Previous 1–4 years                                                       | 0.54                  | 1.06           | 0.61              |
|                                                                       | Previous 5–7 years                                                       | -6.49                 | 4.77           | 0.17              |
|                                                                       | Previous 8–10 years                                                      | 5.29                  | 3.34           | 0.11              |

DPP4i, dipeptidyl peptidase-4 inhibitors.

<sup>a</sup> Sulfonylureas and meglitinides.

<sup>b</sup> Dipeptidyl peptidase-4 inhibitors (DPP4i) and glucagon-like peptide-1 receptor agonists.

**Web Table 3.** Regression Coefficient Estimates for the Cox Model for Assessing Association Between Metformin Exposure and Breast Cancer (Excluding Prostate and Pancreatic Cancer) During 2004–2012 in Israeli Individuals with Diabetes, Controlling for All Other Glucose-Lowering Medications, and Adjusting for Confounding Variables

| Variable (Reference Group)                                            | Category (for Categorical Variables) or Time-Period (for Drug Variables) | Estimated Coefficient | Standard Error | P Value (2-Sided) |
|-----------------------------------------------------------------------|--------------------------------------------------------------------------|-----------------------|----------------|-------------------|
| Age (vs. <50 years)                                                   | 50–59 years                                                              | 0.82                  | 0.08           | <0.001            |
|                                                                       | 60–69 years                                                              | 1.06                  | 0.08           | <0.001            |
|                                                                       | 70–79 years                                                              | 0.86                  | 0.08           | <0.001            |
|                                                                       | ≥80 years                                                                | 0.95                  | 0.11           | <0.001            |
| SES (vs. low)                                                         | High                                                                     | 0.15                  | 0.07           | 0.03              |
|                                                                       | Medium                                                                   | 0.06                  | 0.05           | 0.27              |
|                                                                       | Missing                                                                  | 0.11                  | 0.14           | 0.46              |
| Ethnicity/country of origin (vs. European-American Jew)               | Israel Arab                                                              | -0.51                 | 0.09           | <0.001            |
|                                                                       | Ethiopian Jew                                                            | -1.14                 | 0.36           | 0.0014            |
|                                                                       | Israel Jew                                                               | 0.02                  | 0.07           | 0.74              |
|                                                                       | Asian–African Jew                                                        | -0.08                 | 0.06           | 0.17              |
|                                                                       | Yemeni Jew                                                               | -0.06                 | 0.12           | 0.60              |
| Parity (vs. 0 children)                                               | 1                                                                        | 0.01                  | 0.07           | 0.90              |
|                                                                       | 2–3                                                                      | 0.04                  | 0.07           | 0.51              |
|                                                                       | 4+                                                                       | -0.18                 | 0.08           | 0.03              |
| Insulin                                                               | Previous year                                                            | 0.13                  | 0.22           | 0.55              |
|                                                                       | Previous 1–4 years                                                       | -0.09                 | 0.40           | 0.82              |
|                                                                       | Previous 5–7 years                                                       | 0.33                  | 0.69           | 0.64              |
|                                                                       | Previous 8–10 years                                                      | 1.25                  | 0.66           | 0.06              |
| Metformin (with or without DPP4i)                                     | Previous year                                                            | 0.21                  | 0.13           | 0.10              |
|                                                                       | Previous 1–4 years                                                       | -0.05                 | 0.20           | 0.78              |
|                                                                       | Previous 5–7 years                                                       | -0.07                 | 0.27           | 0.80              |
|                                                                       | Previous 8–10 years                                                      | 0.19                  | 0.59           | 0.74              |
| Insulin secretagogues <sup>a</sup> and incretin mimetics <sup>b</sup> | Previous year                                                            | 0.18                  | 0.13           | 0.17              |
|                                                                       | Previous 1–4 years                                                       | -0.29                 | 0.24           | 0.23              |
|                                                                       | Previous 5–7 years                                                       | 0.27                  | 0.36           | 0.46              |
|                                                                       | Previous 8–10 years                                                      | -1.34                 | 1.11           | 0.23              |
| Alpha-glucosidase inhibitor                                           | Previous year                                                            | 0.88                  | 0.81           | 0.27              |
|                                                                       | Previous 1–4 years                                                       | -1.71                 | 1.43           | 0.23              |
|                                                                       | Previous 5–7 years                                                       | 4.26                  | 1.26           | 0.0007            |
|                                                                       | Previous 8–10 years                                                      | -41.9                 | 30.1           | 0.16              |
| Rosiglitazone                                                         | Previous year                                                            | 0.05                  | 0.84           | 0.95              |
|                                                                       | Previous 1–4 years                                                       | -1.91                 | 1.45           | 0.19              |
|                                                                       | Previous 5–7 years                                                       | 0.70                  | 1.95           | 0.72              |
|                                                                       | Previous 8–10 years                                                      | 11.9                  | 27.8           | 0.67              |

DPP4i, dipeptidyl peptidase-4 inhibitors.

<sup>a</sup> Sulfonylureas and meglitinides.

<sup>b</sup> Dipeptidyl peptidase-4 inhibitors (DPP4i) and glucagon-like peptide-1 receptor agonists.

**Web Table 4.** Regression Coefficient Estimates for the Cox Model for Assessing Association Between Metformin Exposure and Lung Cancer (Excluding Prostate and Pancreatic Cancer) During 2004–2012 in Israeli Individuals with Diabetes, Controlling for All Other Glucose-Lowering Medications, and Adjusting for Confounding Variables

| Variable (Reference Group)                                            | Category (for Categorical Variables) or Time-Period (for Drug Variables) | Estimated Coefficient | Standard Error | P Value (2-Sided) |
|-----------------------------------------------------------------------|--------------------------------------------------------------------------|-----------------------|----------------|-------------------|
| Age (vs. <50 years)                                                   | 50–59 years                                                              | 1.49                  | 0.15           | <0.001            |
|                                                                       | 60–69 years                                                              | 2.21                  | 0.14           | <0.001            |
|                                                                       | 70–79 years                                                              | 2.50                  | 0.15           | <0.001            |
|                                                                       | ≥80 years                                                                | 2.58                  | 0.17           | <0.001            |
| Sex (vs. male)                                                        | Female                                                                   | -0.39                 | 0.06           | <0.001            |
| SES (vs. low)                                                         | High                                                                     | -0.26                 | 0.09           | 0.002             |
|                                                                       | Medium                                                                   | -0.17                 | 0.07           | 0.011             |
|                                                                       | Missing                                                                  | -0.43                 | 0.20           | 0.031             |
| Ethnicity/country of origin (vs. European-American Jew)               | Israel Arab                                                              | -0.19                 | 0.09           | 0.047             |
|                                                                       | Ethiopian Jew                                                            | -1.32                 | 0.58           | 0.022             |
|                                                                       | Israel Jew                                                               | -0.23                 | 0.09           | 0.009             |
|                                                                       | Asian–African Jew                                                        | -0.28                 | 0.07           | <0.001            |
|                                                                       | Yemenite Jew                                                             | -0.44                 | 0.16           | 0.006             |
| Smoking (vs. never smoked or missing)                                 | Current or former smoker                                                 | 1.22                  | 0.06           | <0.0001           |
| Insulin                                                               | Previous year                                                            | 0.18                  | 0.22           | 0.40              |
|                                                                       | Previous 1–4 years                                                       | 0.03                  | 0.40           | 0.94              |
|                                                                       | Previous 5–7 years                                                       | 0.26                  | 0.69           | 0.70              |
|                                                                       | Previous 8–10 years                                                      | -2.17                 | 3.82           | 0.57              |
| Metformin (with or without DPP4i)                                     | Previous year                                                            | -0.07                 | 0.15           | 0.65              |
|                                                                       | Previous 1–4 years                                                       | -0.16                 | 0.25           | 0.52              |
|                                                                       | Previous 5–7 years                                                       | 0.18                  | 0.32           | 0.57              |
|                                                                       | Previous 8–10 years                                                      | 0.84                  | 0.65           | 0.20              |
| Insulin secretagogues <sup>a</sup> and incretin mimetics <sup>b</sup> | Previous year                                                            | -0.03                 | 0.17           | 0.86              |
|                                                                       | Previous 1–4 years                                                       | 0.03                  | 0.28           | 0.92              |
|                                                                       | Previous 5–7 years                                                       | 0.25                  | 0.42           | 0.56              |
|                                                                       | Previous 8–10 years                                                      | -1.23                 | 1.17           | 0.29              |
| Alpha-glucosidase inhibitor                                           | Previous year                                                            | 0.77                  | 1.07           | 0.47              |
|                                                                       | Previous 1–4 years                                                       | -0.29                 | 1.92           | 0.88              |
|                                                                       | Previous 5–7 years                                                       | -2.74                 | 3.80           | 0.47              |
|                                                                       | Previous 8–10 years                                                      | 0.44                  | 7.77           | 0.96              |
| Rosiglitazone                                                         | Previous year                                                            | -1.21                 | 0.87           | 0.17              |
|                                                                       | Previous 1–4 years                                                       | 2.36                  | 0.81           | 0.004             |
|                                                                       | Previous 5–7 years                                                       | -1.86                 | 2.07           | 0.37              |
|                                                                       | Previous 8–10 years                                                      | -                     | -              | -                 |

DPP4i, dipeptidyl peptidase-4 inhibitors.

<sup>a</sup> Sulfonylureas and meglitinides.

<sup>b</sup> Dipeptidyl peptidase-4 inhibitors (DPP4i) and glucagon-like peptide-1 receptor agonists.

**Web Table 5.** Regression Coefficient Estimates for the Cox Model for Assessing Association Between Metformin Exposure and Bladder Cancer (Excluding Prostate and Pancreatic Cancer) During 2004–2012 in Israeli Individuals with Diabetes, Controlling for All Other Glucose-Lowering Medications, and Adjusting for Confounding Variables

| Variable (Reference Group)                                            | Category (for Categorical Variables) or Time-Period (for Drug Variables) | Estimated Coefficient | Standard Error | P Value (2-Sided) |
|-----------------------------------------------------------------------|--------------------------------------------------------------------------|-----------------------|----------------|-------------------|
| Age (vs. <50 years)                                                   | 50–59 years                                                              | 1.35                  | 0.21           | <0.001            |
|                                                                       | 60–69 years                                                              | 2.14                  | 0.20           | <0.001            |
|                                                                       | 70–79 years                                                              | 2.61                  | 0.20           | <0.001            |
|                                                                       | ≥80 years                                                                | 3.03                  | 0.22           | <0.001            |
| Sex (vs. male)                                                        | Female                                                                   | -1.48                 | 0.10           | <0.001            |
| SES (vs. low)                                                         | High                                                                     | -0.02                 | 0.11           | 0.84              |
|                                                                       | Medium                                                                   | -0.14                 | 0.09           | 0.10              |
|                                                                       | Missing                                                                  | 0.15                  | 0.20           | 0.47              |
| Ethnicity/country of origin (vs. European-American Jew)               | Israel Arab                                                              | -0.14                 | 0.13           | 0.28              |
|                                                                       | Ethiopian Jew                                                            | -2.01                 | 1.00           | 0.045             |
|                                                                       | Israel Jew                                                               | 0.06                  | 0.11           | 0.59              |
|                                                                       | Asian–African Jew                                                        | -0.03                 | 0.09           | 0.74              |
|                                                                       | Yemenite Jew                                                             | -0.48                 | 0.22           | 0.029             |
| Smoking (vs. never smoked or missing)                                 | Current or former smoker                                                 | 0.70                  | 0.08           | <0.001            |
| Insulin                                                               | Previous year                                                            | 0.32                  | 0.21           | 0.13              |
|                                                                       | Previous 1–4 years                                                       | 0.23                  | 0.38           | 0.55              |
|                                                                       | Previous 5–7 years                                                       | -1.82                 | 1.42           | 0.20              |
|                                                                       | Previous 8–10 years                                                      | 2.08                  | 1.26           | 0.10              |
| Metformin (with or without DPP4i)                                     | Previous year                                                            | -0.02                 | 0.20           | 0.94              |
|                                                                       | Previous 1–4 years                                                       | -0.09                 | 0.31           | 0.77              |
|                                                                       | Previous 5–7 years                                                       | 0.07                  | 0.41           | 0.86              |
|                                                                       | Previous 8–10 years                                                      | 0.85                  | 0.79           | 0.28              |
| Insulin secretagogues <sup>a</sup> and incretin mimetics <sup>b</sup> | Previous year                                                            | 0.07                  | 0.20           | 0.71              |
|                                                                       | Previous 1–4 years                                                       | 0.24                  | 0.33           | 0.48              |
|                                                                       | Previous 5–7 years                                                       | 0.04                  | 0.51           | 0.94              |
|                                                                       | Previous 8–10 years                                                      | -1.44                 | 1.40           | 0.30              |
| Alpha-glucosidase inhibitor                                           | Previous year                                                            | 1.47                  | 1.03           | 0.15              |
|                                                                       | Previous 1–4 years                                                       | 0.23                  | 1.79           | 0.90              |
|                                                                       | Previous 5–7 years                                                       | -4.24                 | 3.55           | 0.23              |
|                                                                       | Previous 8–10 years                                                      | 5.99                  | 3.30           | 0.07              |
| Rosiglitazone                                                         | Previous year                                                            | 0.93                  | 0.86           | 0.28              |
|                                                                       | Previous 1–4 years                                                       | -1.32                 | 1.35           | 0.33              |
|                                                                       | Previous 5–7 years                                                       | 3.46                  | 1.26           | 0.006             |
|                                                                       | Previous 8–10 years                                                      | -                     | -              | -                 |

DPP4i, dipeptidyl peptidase-4 inhibitors.

<sup>a</sup> Sulfonylureas and meglitinides.

<sup>b</sup> Dipeptidyl peptidase-4 inhibitors (DPP4i) and glucagon-like peptide-1 receptor agonists.
